# Supplementary material for: Correlates of protection against symptomatic and asymptomatic SARS-CoV-2 infection
Source: PubMed Central journal article supplement (PMC8604724; doi:10.1038/s41591-021-01540-1), 2021-09-29
Supplement: 41591_2021_1540_MOESM1_ESM.pdf [file 41591_2021_1540_MOESM1_ESM.pdf]

**Supplementary information**

---

**Correlates of protection against  
symptomatic and asymptomatic SARS-  
CoV-2 infection**

---

In the format provided by the  
authors and unedited

Correlates of protection against symptomatic and asymptomatic SARS-CoV-2 infection. Supplementary Material.

## Table of Contents

|                                                                                                                                                                                                                                                                                  |               |
|----------------------------------------------------------------------------------------------------------------------------------------------------------------------------------------------------------------------------------------------------------------------------------|---------------|
| 1. <b>Table S1.</b> Antigen information and sequence information for SARS-CoV-2 Spike Trimer, SARS-CoV-2 Nucleocapsid and SARS-CoV-2 Receptor Binding Domain.....                                                                                                                | <b>Pg. 2</b>  |
| 2. <b>Table S2.</b> Anti-SARS-CoV-2 Spike and RBD IgG, pseudovirus neutralisation antibody titres and live virus neutralisation antibody titres (Median and IQR) by primary symptomatic, asymptomatic/unknown, non-primary cases, NAAT positive cases and negative controls..... | <b>Pg. 3</b>  |
| 3. <b>Table S3.</b> Coefficients and p-values from baseline exposure logistic regression model fitted to MenACWY control participants, and from the inverse probability weighting model for predicting the availability of anti-spike IgG antibody data.....                     | <b>Pg. 4</b>  |
| 4. <b>Table S4.</b> Outputs from modelling of correlates of vaccine efficacy, with immune marker values associated with vaccine efficacy estimates at 10% increments .....                                                                                                       | <b>Pg. 5</b>  |
| 5. R syntax including main functions for analyses .....                                                                                                                                                                                                                          | <b>Pg. 8</b>  |
| 6. Acknowledgements.....                                                                                                                                                                                                                                                         | <b>Pg. 10</b> |

**Table S1. Antigen information and sequence information for SARS-CoV-2 Spike Trimer, SARS-CoV-2 Nucleocapsid and SARS-CoV-2 Receptor Binding Domain**

**Antigen information:**

Antigen Name: SARS-CoV-2 Spike Trimer  
 Organism: SARS-CoV-2 (Novel Coronavirus 2019-nCoV)  
 MSD Spot Name: CoV-2 Spike

**Sequence Information:**

**Protein Sequence:**

MFVFLVLLPLVSSQCVNLTTRTQLPPAYTNSFTRGVVYYPDKVFRSSVLHSTQDLFLPFFSNVTWFHAIHVSGTNGTKRFDN  
 PVLPFNDGVYFASTEKSNIRGWIFGTTLDSTKQSLIVNNATNVVIVKCEFCNDPFLGVYYHKNNKSWMESEFRVYSS  
 ANNCTFEYVSQPFLMDLEGKQGNFKNREFVFKNIDGYFKIYSKHTPINLVRDLPQGFSALEPLVDLPIGINITRFQTLALH  
 RSYLTPGDSSSGWTAGAAAYVGYLQPRTFLLKYNENGTITDAVDCALDPLSEKTKLKSFTVEKGIYQTSNFRVQPTESIV  
 RFPNITNLCPFGEVFNATRFASVYAWNRKRISNCVADYSVLYNSASFSTFKCYGVSPTKLNLDLFCFTNVYADSFVIRGDEVR  
 QIAPGQTGKIADYNYKLPDDFTGCVIAWNSNNLDSKVGGNVNYLYRFRKSNLKPFRDISTEIQAGSTPCNGVEGFNC  
 YFPLQSYGFQPTNGVGYQPYRVVLSFELLHAPATVCGPKKSTNLVKNKCVNFNGLTGTGVLTESNKKFLPFQGFGRD  
 IADTTDAVRDPQTLEILDITPCSFGGVSVITPGTNTSNQVAVLYQDVNCTEVPVAIHADQLTPTWRVYSTGNSVVFQTRAG  
 CLIGAEHVNNSYECDIPIGAGICASYQTQNSP**GSASSVASQSI**IAYTMSLGAENSVAYSNNNSIAIPTNFTISVTTEILPVSMT  
 KTSVDCTMYICGDSTECNLLLQYGSFCTQLNRALTGIAVEQDKNTQEVFAQVKQIYKTPPIKDFGGFNFSQILPDPSKPSK  
 RSFIEDLLFNKVTADAGFIKQYGDCLGDI AARDLICAQKFNGLTVLPLLTDEMI AQYTSALLAGTITSGWTFGAGAALQI  
 PFAMQMAYRFNGIGVTVQNVLYENQKLIANQFN SAIGKIQDLSSTASALGKLQDVVNQNAQALNTLVKQLSSNFGAISS  
 VLNDILSRDLPPEAEVQIDRLITGRQLSLQTYVTQQLIRAAEIRASANLAATKMSECVLGQSKRVDFCGKGYHLMSPQSA  
 PHGVVFLHVTYVPAQEKNF TTA PAICH DGKAHFPREGV FVSNGTHWFVTQRNFYEPQIITDNTFVSGNCDVVIGIVNN  
 TVYDPLQPELDSFKEELDKYFNHTSPDVLGDISGINASV VNIQEKIDRLNEVAKNLNESLIDLQELGKYEQSA **GYIPEAPR**  
**DGQAYVRKDG EWVLLSTFLGENLYFQGHHHHHHS A WSH PQFEKGGGGGGGGSSAW SH PQFEK**

**Antigen information:**

Antigen Name: SARS-CoV-2 Nucleocapsid  
 Organism: SARS-CoV-2 (Novel Coronavirus 2019-nCoV)  
 MSD Spot Name: CoV-2 N

**Sequence Information:**

**Protein Sequence:**

MKWVTFISLLFLFSSAYS**RG**SDNGPQNQRNAPRITFGGSPDSTGSNQNGERSGARSKQRRPQGLPNNTASWFTALTQH  
 GKEDLKFRGQGVPIINTNSSPDDQIGYRRARRIRGGDGKMKDLSRWFYFYLTGPEAGLPYGANKDGIWVATEG  
 ALNTPKD HIGTRNPANNAIVLQLPQGTTLPKGFYAEGSRGGSQASSRSSSRN SRNSTPGSSRGTS PARMAGNGGD  
 AALALLLDRLNQLESKMSGKGQQQGGQTVTKSAAEASKKPRQKRTATKAYNVTAQFRRGPEQTQGNFGDQELIR  
 QGTDYKHWPQIAQFAPSASAFFGMSRIGMEVTPSGTWLTYTGAIKLDDKDPNFKDQVILLNKHIDAYKTFPPTEPKKDK  
 KKADETQALPQRQKKQQTVTLPAADLDDFSKQLQSMSSADSTQA**ENLYFQGS**HHHHHP

**Antigen information:**

Antigen Name: SARS-CoV-2 Receptor Binding Domain  
 Organism: SARS-CoV-2 (Novel Coronavirus 2019-nCoV)  
 MSD Spot Name: CoV-2 RB

**Sequence Information:**

**Protein Sequence: R319-F541 of the SARS-2 CoV Spike Sequence**

QRVQPTESIVRFPNITNLCPFGEVFNATRFASVYAWNRKRISNCVADYSVLYNSASFSTFKCYGVSPTKLNLDLFCFTNVYA  
 DSFVIRGDEVRQIAPGQTGKIADYNYKLPDDFTGCVIAWNSNNLDSKVGGNVNYLYRFRKSNLKPFRDISTEIQAGS  
 TPCNGVEGFNCYFPLQSYGFQPTNGVGYQPYRVVLSFELLHAPATVCGPKKSTNLVKNKCVNFHHHHHH

**Table S2. Anti-SARS-CoV-2 Spike and RBD IgG, pseudovirus neutralisation antibody titres and live virus neutralisation antibody titres (Median and IQR) by primary symptomatic, asymptomatic/unknown, non-primary cases, NAAT positive cases and negative controls**

| <b>Immune marker</b>                                      | <b>Outcome</b>       | <b>No. participant</b> | <b>Median (IQR)</b>  |
|-----------------------------------------------------------|----------------------|------------------------|----------------------|
| <b>Anti-spike IgG (AU/ml)</b>                             | <b>NAAT Negative</b> | 1155                   | 33945 (18450, 59260) |
|                                                           | <b>NAAT positive</b> | 163                    | 30501 (16088, 49529) |
|                                                           | Primary              | 52                     | 26144 (16147, 39996) |
|                                                           | Asymptomatic         | 91                     | 31115 (16112, 54118) |
|                                                           | Non-primary          | 20                     | 33896 (15976, 45307) |
| <b>Anti-RBD IgG (AU/ml)</b>                               | <b>NAAT Negative</b> | 1155                   | 45693 (24009, 82432) |
|                                                           | <b>NAAT positive</b> | 163                    | 40884 (20871, 62934) |
|                                                           | Primary              | 52                     | 37276 (21560, 58033) |
|                                                           | Asymptomatic         | 91                     | 40884 (20944, 74226) |
|                                                           | Non-primary          | 20                     | 43673 (20474, 54332) |
| <b>Pseudovirus neutralisation titre (ID<sub>50</sub>)</b> | <b>NAAT Negative</b> | 828                    | 158 (81, 328)        |
|                                                           | <b>NAAT positive</b> | 149                    | 160 (85, 304)        |
|                                                           | Primary              | 47                     | 135 (75, 240)        |
|                                                           | Asymptomatic         | 86                     | 172 (91, 338)        |
|                                                           | Non-primary          | 16                     | 162 (109, 260)       |
| <b>Live virus neutralisation titre (NF<sub>50</sub>)</b>  | <b>NAAT Negative</b> | 412                    | 184 (101, 344)       |
|                                                           | <b>NAAT positive</b> | 110                    | 206 (124, 331)       |
|                                                           | Primary              | 36                     | 166 (112, 231)       |
|                                                           | Asymptomatic         | 62                     | 261 (129, 359)       |
|                                                           | Non-primary          | 12                     | 176 (138, 277)       |

Primary symptomatic cases: NAAT+ with at least one COVID symptom (cough, fever, shortness of breath, anosmia, aguesia). Asymptomatic cases: NAAT+ on weekly self-swab with no symptoms recorded. Non-primary cases: NAAT+ with only non-primary COVID symptoms (e.g. nausea, diarrhoea). ND<sub>50</sub>: neutralisation dilution for 50% virus inhibition; NF<sub>50</sub>: Normalised ND50 values; IgG: Immunoglobulin G; RBD: receptor binding domain. AU/ml: arbitrary units per millilitre.

**Table S3. Coefficients and p-values from baseline exposure logistic regression model fitted to MenACWY control participants, and from the inverse probability weighting model for predicting the availability of anti-spike IgG antibody data.**

|                                                               | Coefficient<br>from logistic<br>regression (log-<br>odds ratio) | p-value |
|---------------------------------------------------------------|-----------------------------------------------------------------|---------|
| <b>Baseline Exposure Risk Model</b>                           |                                                                 |         |
| Age (per year)                                                | -0.0260                                                         | <0.001  |
| Non-white ethnicity (vs white)                                | -0.0885                                                         | 0.702   |
| BMI $\geq$ 30 (vs < 30 kg/m <sup>2</sup> )                    | 0.1322                                                          | 0.348   |
| Having any defined co-morbidities (vs none)                   | -0.0935                                                         | 0.514   |
| <b>Healthcare worker status</b>                               |                                                                 |         |
| Not a healthcare worker                                       | ref                                                             |         |
| Healthcare worker facing more than 1 COVID patient per day    | 0.3418                                                          | 0.017   |
| Healthcare worker facing up to 1 COVID patient per day        | 0.1379                                                          | 0.331   |
| <b>Inverse Probability Weighting Model for Anti-spike IgG</b> |                                                                 |         |
| <b>Age group</b>                                              |                                                                 |         |
| 18-55 years                                                   | ref                                                             |         |
| 56-69 years                                                   | -0.7515                                                         | <0.001  |
| $\geq$ 70 years                                               | -1.0705                                                         | <0.001  |
| <b>Dosage schedule</b>                                        |                                                                 |         |
| LD/LD                                                         | ref                                                             |         |
| LD/SD                                                         | 17.0832                                                         | 0.927   |
| SD/SD                                                         | 17.7413                                                         | 0.925   |
| <b>Prime-boost interval</b>                                   |                                                                 |         |
| < 6 weeks                                                     | ref                                                             |         |
| 6-8 weeks                                                     | -0.1096                                                         | 0.504   |
| 9-11 weeks                                                    | -0.3195                                                         | 0.071   |
| $\geq$ 12 weeks                                               | -0.8142                                                         | <0.001  |
| <b>Outcome</b>                                                |                                                                 |         |
| NAAT negative                                                 | ref                                                             |         |
| Primary symptomatic                                           | 4.7880                                                          | <0.001  |
| Asymptomatic                                                  | 4.4852                                                          | <0.001  |
| Non-primary symptomatic                                       | 17.4349                                                         | 0.973   |

The p values were obtained by two-sided Wald test.

**Table S4. Outputs from modelling of correlates of vaccine efficacy, with immune marker values associated with vaccine efficacy estimates at 10% increments**

| Unit                      | Outcome                | p immune marker | p baseline risk score | No. case | No. Non case | 50% VE (95% CI)        | 60% VE (95% CI)         | 70% VE (95% CI)         | 80% VE (95% CI)         | 90% VE (95% CI)           |
|---------------------------|------------------------|-----------------|-----------------------|----------|--------------|------------------------|-------------------------|-------------------------|-------------------------|---------------------------|
| <b>Anti-Spike IgG</b>     |                        |                 |                       |          |              |                        |                         |                         |                         |                           |
|                           | Asymptomatic           | 0.215           | 0.951                 | 91       | 1155         |                        |                         |                         |                         |                           |
|                           | Asymptomatic (Ct < 30) | 0.059           | 0.375                 | 39       | 1207         |                        |                         |                         |                         |                           |
| <b>AU/ml<sup>a</sup></b>  | Shortness of breath    | 0.016           | 0.001                 | 28       | 1155         | 2075<br>(11349, 23658) | 11402<br>(11349, 30901) | 21876<br>(11349, 40829) | 36641<br>(14092, 76203) | 70464<br>(38634, 1629184) |
| <b>BAU/ml<sup>a</sup></b> |                        |                 |                       |          |              | 13<br>(73, 153)        | 74<br>(73, 199)         | 141<br>(73, 263)        | 236<br>(91, 492)        | 454<br>(249, 10508)       |
|                           | No shortness of breath | 0.238           | 0.006                 | 24       | 1155         |                        |                         |                         |                         |                           |
| <b>AU/ml<sup>a</sup></b>  | 3 or more symptoms     | 0.014           | 0.001                 | 32       | 1155         | NC                     | 20796<br>(NC, 39081)    | 31693<br>(NC, 51876)    | 46448<br>(24545, 89119) | 77619<br>(45917, 394430)  |
| <b>BAU/ml<sup>a</sup></b> |                        |                 |                       |          |              | NC                     | 134<br>(NC, 252)        | 204<br>(NC, 335)        | 300<br>(158, 575)       | 501<br>(296, 2544)        |
| <b>Anti-RBD IgG</b>       |                        |                 |                       |          |              |                        |                         |                         |                         |                           |
|                           | Asymptomatic           | 0.283           | 0.905                 | 91       | 1155         |                        |                         |                         |                         |                           |
|                           | Asymptomatic (Ct < 30) | 0.083           | 0.391                 | 39       | 1207         |                        |                         |                         |                         |                           |
| <b>AU/ml<sup>a</sup></b>  | Shortness of breath    | 0.035           | 0.002                 | 28       | 1155         | NC                     | NC                      | 31115<br>(NC, 59425)    | 52841<br>(NC, 126465)   | 103269<br>(55204, NC)     |
| <b>BAU/ml<sup>a</sup></b> |                        |                 |                       |          |              | NC                     | NC                      | 248<br>(NC, 474)        | 422<br>(NC, 1009)       | 824<br>(441, NC)          |

|                                         |                           |        |        |    |      |                             |                             |                              |                                |                                |
|-----------------------------------------|---------------------------|--------|--------|----|------|-----------------------------|-----------------------------|------------------------------|--------------------------------|--------------------------------|
|                                         | No shortness of breath    | 0.494  | 0.009  | 23 | 1155 |                             |                             |                              |                                |                                |
| <b>AU/ml<sup>a</sup></b>                | 3 or more symptoms        | 0.032  | 0.002  | 32 | 1155 | NC                          | 28838<br>(NC, 58340)        | 46663<br>(NC, 81465)         | 69979<br>(34671, 162170)       | 119942<br>(67759, 1462076)     |
| <b>BAU/ml<sup>a</sup></b>               |                           |        |        |    |      | NC                          | 230<br>(NC, 466)            | 372<br>(NC, 650)             | 558<br>(277, 1294)             | 957<br>(541, 11667)            |
| <b>Live virus neutralisation assay</b>  |                           |        |        |    |      |                             |                             |                              |                                |                                |
| <b>ND50</b>                             | Symptomatic               | <0.001 | <0.001 | 36 | 414  | 167<br>(35, 282)            | 209<br>(83, 364)            | 290<br>(143, 537)            | 488<br>(229, 1211)             | 4188<br>(538, 1211)            |
| <b>IU/ml</b>                            | Symptomatic               |        |        |    |      | 41<br>(9, 69)               | 52<br>(20, 90)              | 71<br>(35, 132)              | 120<br>(56, 298)               | 1030<br>(132, 298)             |
|                                         | Asymptomatic              | 0.591  | 0.345  | 62 | 412  |                             |                             |                              |                                |                                |
|                                         | Asymptomatic<br>(Ct < 30) | 0.068  | 0.802  | 29 | 445  |                             |                             |                              |                                |                                |
| <b>NF50</b>                             | Shortness of breath       | <0.001 | <0.001 | 22 | 412  | 98<br>(52, 184)             | 124<br>(52, 228)            | 167<br>(78, 310)             | 251<br>(122, NC)               | 512<br>(233, NC)               |
|                                         | No shortness of breath    | 0.482  | <0.001 | 14 | 412  |                             |                             |                              |                                |                                |
| <b>NF50</b>                             | 3 or more symptoms        | <0.001 | <0.001 | 21 | 412  | 84<br>(NC, 209)             | 118<br>(NC, 242)            | 168<br>(NC, 324)             | 252<br>(NC, 643)               | 495<br>(217, 643)              |
| <b>Pseudovirus neutralisation assay</b> |                           |        |        |    |      |                             |                             |                              |                                |                                |
| <b>ID50<sup>b</sup></b>                 |                           |        |        |    |      | 13<br>(NC, 42) <sup>b</sup> | 25<br>(NC, 69) <sup>b</sup> | 61<br>(NC, 167) <sup>b</sup> | 187<br>(NC, 1455) <sup>b</sup> | 1021<br>(299, NC) <sup>b</sup> |
| <b>IU/ml<sup>c</sup></b>                | Symptomatic               | 0.005  | <0.001 | 47 | 828  | NC                          | 3<br>(NC, 11)               | 8<br>(NC, 27)                | 27<br>(NC, NC)                 | 143<br>(44, NC)                |
| <b>IU/ml<sup>d</sup></b>                |                           |        |        |    |      | NC                          | 3<br>(NC, 12)               | 9<br>(NC, 28)                | 28<br>(NC, NC)                 | 151<br>(47, NC)                |
|                                         | Asymptomatic              | 0.404  | 0.998  | 86 | 828  |                             |                             |                              |                                |                                |

|                         |                           |        |        |    |     |                             |                              |                              |                                |                                 |
|-------------------------|---------------------------|--------|--------|----|-----|-----------------------------|------------------------------|------------------------------|--------------------------------|---------------------------------|
|                         | Asymptomatic<br>(Ct < 30) | 0.785  | 0.486  | 37 | 877 |                             |                              |                              |                                |                                 |
| <b>ID50</b>             |                           |        |        |    |     | 34<br>(NC, 96)              | 54<br>(NC, 142)              | 90<br>(NC, 208)              | 167<br>(71, 348)               | 386<br>(177, 1230)              |
| <b>ID50<sup>b</sup></b> | Shortness of<br>breath    | <0.001 | <0.001 | 27 | 828 | 37<br>(NC, 84) <sup>b</sup> | 55<br>(NC, 124) <sup>b</sup> | 90<br>(NC, 186) <sup>b</sup> | 162<br>(69, 327) <sup>b</sup>  | 385<br>(171, 1337) <sup>b</sup> |
| <b>IU/ml</b>            |                           |        |        |    |     | 5<br>(NC, 14)               | 8<br>(NC, 20)                | 13<br>(NC, 30)               | 24<br>(10, 50)                 | 55<br>(25, 176)                 |
|                         | No shortness<br>of breath | 0.868  | <0.001 | 20 | 828 |                             |                              |                              |                                |                                 |
| <b>ID50</b>             |                           |        |        |    |     | NC                          | 23<br>(NC, 176)              | 89<br>(NC, 284)              | 228<br>(NC, 7295)              | 644<br>(232, NC)                |
| <b>ID50<sup>b</sup></b> | 3 or more<br>symptoms     | 0.015  | <0.001 | 28 | 828 | NC <sup>b</sup>             | NC <sup>b</sup>              | 99<br>(NC, 280) <sup>b</sup> | 236<br>(NC, 2198) <sup>b</sup> | 625<br>(232, NC) <sup>b</sup>   |
| <b>IU/ml</b>            |                           |        |        |    |     | NC                          | 3<br>(NC, 25)                | 13<br>(NC, 41)               | 32<br>(NC, 1042)               | 92<br>(33, NC)                  |

ID50 and ND50: neutralisation dilution for 50% virus inhibition; NF50: Normalised ND50 values; NC: not computed; IgG: Immunoglobulin G; RBD: receptor binding domain. AU/ml: arbitrary units per millilitre; BAU/ml: Binding antibody units per millilitre (WHO international standard 20/136), IU/ml: international units per millilitre (WHO international standard 20/136).

Results were not computed for assays in which the relationship between antibody and outcome was non-significant. Where CIs were outside the range of values of the assay these are reported as 'not computed' (NC). The two-sided p value for each immune marker (column 3) is from the generalised additive models, showing the strength of the relationship between the antibody value and infection. The p-values were not adjusted for multiple comparisons.

<sup>a</sup> BAU/ml and IU/ml values are presented using the WHO international standard (NIBSC code 20/136).

<sup>b</sup> Sensitivity analysis using a Gibbs sampler within each bootstrap sample to impute censored pseudovirus neutralisation titres below LLOQ.

<sup>c</sup> Alternative WHO conversion using geometric mean conversion factor rather than the mean conversion factor shown in Table 2

<sup>d</sup> Alternative WHO conversion using median conversion factor rather than the mean conversion factor shown in Table 2



## R syntax including main functions for analyses

```
#
# R syntax including main functions for analyses on September 6th 2021
#
# Shuo Feng, Daniel Phillips, Thomas White, Homesh Sayal, et al.
# Correlates of protection against symptomatic and asymptomatic SARS-CoV-2 infection
#
# Writen by Shuo Feng
#
# This function is used for estimating the point estimates of correlates of risk for each participant in dataset
# Median and 95% CI could be further obtained by bootstrap resampling, which is not covered by this function
#
# Arguments in the function f.cor.PB28.ipw.bs
# data - Main dataset for correlates analysis
# model.predictor - binding and neutralising antibody variables (log scale)
# model.outcome - symptomatic/asymptomatic SARS-CoV-s infection variables
#

f.cor.PB28.ipw.bs <- function(data, model.predictor, model.outcome){

  rand.ratio1 <- 3 # randomisation ratio 3:1 for study group 1 and 7 in COV002
  rand.ratio2 <- 5 # randomisation ratio 5:1 for study group 2, 8 and 5d in COV002

  # model variable - predictor and outcome
  data$pred.var <- data[, model.predictor]
  data$outcome.var <- data[, model.outcome]

  # get weighted incidences among control participants receiving MenACWY vaccine
  tab <- as.data.frame(matrix(table(data$cor2dose_outcome[which(data$As_vaccinated_arm_2 == 'Control',)],
                                data$study_group_2[which(data$As_vaccinated_arm_2 == 'Control',)]))
  tab <- as.data.frame(t(tab))
  tab$study_group_2 <- rownames(tab)
  tab[which(tab$study_group_2 %in% c(1,7)), 1:4] <- tab[which(tab$study_group_2 %in% c(1,7)),
1:4]*rand.ratio1
  tab[which(tab$study_group_2 %in% c(2,8,'5d')), 1:4] <- tab[which(tab$study_group_2 %in% c(2,8,'5d')),
1:4]*rand.ratio2
  tab <- data.frame(rbind(tab, c(colSums(tab[,1:4]), 'total')))
  colnames(tab) <- c('negative', 'symptomatic', 'asymptomatic', 'non-primary', 'study_group_2')

  # restrict participants to Correlates Population (both ChAdOx and MenACWY)
  data <- data[which(data$cor2dose_cohort == 'Yes'), ]

  # incidence table by ChAdOx and MenACWY control group, before and after weighting
  inc <- data.frame(n.total = c(sum(data$As_vaccinated_arm_2 == 'ChAdOx1' & !is.na(data[, model.outcome])),
                              sum(data$As_vaccinated_arm_2 == 'Control' & !is.na(data[, model.outcome]))))
  inc$cases <- c(sum(data$As_vaccinated_arm_2 == 'ChAdOx1' & data[, model.outcome] == 1, na.rm = T),
                sum(data$As_vaccinated_arm_2 == 'Control' & data[, model.outcome] == 1, na.rm = T))
  inc$non_cases <- c(sum(data$As_vaccinated_arm_2 == 'ChAdOx1' & data[, model.outcome] == 0, na.rm = T),
                    sum(data$As_vaccinated_arm_2 == 'Control' & data[, model.outcome] == 0, na.rm = T))
  inc$abs_risk <- inc$cases/(inc$cases + inc$non_cases)
  rownames(inc) <- c('ChAdOx1', 'Control')
  inc$n.total_w <- inc$n.total # weighted total
  inc$n.total_w[2] <- as.numeric(tab$negative[nrow(tab)]) + as.numeric(tab[nrow(tab), model.outcome]) #
weighted total account for weights in MenACWY
  inc$cases_w <- inc$cases # weighted number of cases
```

```

inc$cases_w[2] <- as.numeric(tab[nrow(tab), model.outcome]) # weighted number of cases account for
weights in MenACWY
inc$non_cases_w <- inc$n.total_w - inc$cases_w # weighted number of non-cases
inc$abs_risk_w <- inc$cases_w/inc$n.total_w

# restrict to ChAdOx Correlates Population
data <- data[which(data$As_vaccinated_arm_2 == 'ChAdOx1'), ]

# Inverse probability weighting model on antibody sampling
data$antibody <- 1*(!is.na(data$pred.var))
m.s <- glm(antibody ~ age.group + endpoint.dose + interval.prime.cutoff + cor2dose_outcome,
          family = 'binomial', data = data)
data$p_s <- predict(m.s, newdata = data, type = 'response')
data <- data[which(data$outcome.var == 1 | data$positive == 0), ]

# fit GAM using inverse probability weights
data.pred <- data[which(!is.na(data$pred.var) & !is.na(data$outcome.var) & !is.na(data$risk_score_2)), ]
data.pred <- data.pred[order(data.pred$pred.var), ]

m2 <- gam(outcome.var ~ s(pred.var, bs="cr", k = 3) + risk_score_2, data = data.pred, family = "binomial",
weights = 1/p_s)

output <- list(inc = inc,
              model2 = summary(m2)) # output incidence table and GAM model

# predict absolute risk
pm2 <- data.frame(antibody = data.pred$pred.var) # antibody in original dataset
pm2$pred <- predict(m2, newdata = data.pred, type = 'response') # predicted absolute risk for each individual
participants
output$pm2 <- pm2 # output prediction results

return(output)
}

```

## Acknowledgements

|                                                                         |
|-------------------------------------------------------------------------|
| <b>Clinical Trials Research Governance Office, University of Oxford</b> |
| Ronja Bahadori                                                          |
| Elaine Chick                                                            |
| Heather House                                                           |
| Claire Riddle                                                           |
| <b>Data and Safety Monitoring Board (DSMB)</b>                          |
| George Bouliotis                                                        |
| Steve Black                                                             |
| Elizabeth Bukusi                                                        |
| Cornelia Dekker                                                         |
| Robert Heyderman                                                        |
| Gregory Hussey                                                          |
| Paul Kaye                                                               |
| Bernhards Ogutu                                                         |
| Walter Orenstein                                                        |
| Sonia Ramos                                                             |
| Manish Sadarangani                                                      |
| <b>Department of Paediatrics, University of Oxford</b>                  |
| Georg A. Holländer                                                      |
| <b>Endpoint Evaluation Committee</b>                                    |
| Jeremy Carr                                                             |
| Steve Chambers                                                          |
| Kim Davis                                                               |
| Simon Drysdale                                                          |
| Malick Gibani                                                           |
| Elizabeth Hammershaimb                                                  |
| Michael Harrington                                                      |
| Celina Jin                                                              |
| Seilesh Kadambari                                                       |
| Rama Kandasamy                                                          |
| Toby Maher                                                              |
| Jamilah Meghji                                                          |
| Claire Munro                                                            |
| David Pace                                                              |
| Rekha Rapaka                                                            |
| Robindra Basu Roy                                                       |
| Daniel Silman                                                           |
| Gemma Sinclair                                                          |
| Jing Wang                                                               |
| <b>Jenner Institute, University of Oxford</b>                           |
| Iona Tarbet                                                             |
| <b>Nuffield Department of Medicine, University of Oxford</b>            |
| Richard Cornall                                                         |
| Richard Liwicki                                                         |

|                                                                     |
|---------------------------------------------------------------------|
| Denis Murphy                                                        |
| Elizabeth Salter                                                    |
| Katherine Skinner                                                   |
| Philip Taylor                                                       |
| Oto Velicka                                                         |
| <b>Oxford Research Services (Contracts)</b>                         |
| Carly Banner                                                        |
| Sally Pelling-Deeves                                                |
| Gary Priest                                                         |
| <b>Oxford University Hospitals Trust</b>                            |
| Bruno Holthof                                                       |
| <b>Public Affairs Directorate and Divisional Communication Team</b> |
| Alison Brindle                                                      |
| Alexander Buxton                                                    |
| James Colman                                                        |
| Chris McIntyre                                                      |
| Steve Pritchard                                                     |

---

**Statistical Analysis Plan- Correlates Analysis**

Study Code        D8111  
Edition Number    1.0  
Date                28 May 2021

---

---

**Immune Correlates Analysis**

---

## TABLE OF CONTENTS

|                                                                                                   |   |
|---------------------------------------------------------------------------------------------------|---|
| TITLE PAGE.....                                                                                   | 1 |
| TABLE OF CONTENTS .....                                                                           | 2 |
| LIST OF ABBREVIATIONS .....                                                                       | 3 |
| AMENDMENT HISTORY .....                                                                           | 4 |
| 1. INTRODUCTION.....                                                                              | 5 |
| 1.1 Study Cohort for Correlates Analyses.....                                                     | 5 |
| 1.1.1 Single Dose Analyses .....                                                                  | 5 |
| 1.1.2 Two Dose Analyses.....                                                                      | 5 |
| 1.2 Study Endpoints.....                                                                          | 6 |
| 1.3 Sample Size .....                                                                             | 6 |
| 1.4 Immune Markers.....                                                                           | 6 |
| 2. ANALYSIS .....                                                                                 | 6 |
| 2.1 Data summaries .....                                                                          | 6 |
| 2.2 Risk model (Proxy for SARS-CoV-2 Exposure in participants who received control vaccine) ..... | 7 |
| 2.3 Risk model for availability of antibody data (AZD1222 arm) .....                              | 7 |
| 2.4 Correlates of Risk .....                                                                      | 8 |
| 2.5 Correlates of Vaccine Efficacy (CoVE) .....                                                   | 8 |
| 2.6 Imputation of Censored Data.....                                                              | 8 |
| 3. REFERENCES .....                                                                               | 9 |

## LIST OF FIGURES

|          |                                                                      |   |
|----------|----------------------------------------------------------------------|---|
| Figure 1 | Example plot of predicted probabilities against antibody values..... | 8 |
|----------|----------------------------------------------------------------------|---|

## LIST OF ABBREVIATIONS

| Abbreviation or special term | Explanation                                             |
|------------------------------|---------------------------------------------------------|
| BMI                          | body mass index                                         |
| ChAdOx1 nCoV-19              | name of AZD1222 by the University of Oxford             |
| COVID-19                     | coronavirus disease 2019                                |
| GAM                          | generalised additive model                              |
| GLM                          | generalised linear model                                |
| IgG                          | immunoglobulin G                                        |
| LD                           | low dose                                                |
| LD/LD                        | low dose low dose                                       |
| LD/SD                        | low dose standard dose                                  |
| LLOQ                         | lower limit of quantification                           |
| MAA                          | Marketing Authorisation Application                     |
| MenACWY                      | meningococcal Group A, C, W-135 and Y conjugate vaccine |
| PHE                          | Public Health England                                   |
| RBD                          | receptor binding domain                                 |
| RT-PCR                       | reverse transcriptase polymerase chain reaction         |
| SAP                          | statistical analysis plan                               |
| SARS-CoV-2                   | severe acute respiratory syndrome-coronavirus 2         |
| SD                           | standard dose                                           |
| SD/SD                        | standard dose standard dose                             |
| WHO                          | World Health Organization                               |

## AMENDMENT HISTORY

### Version 1: Summary of Changes

| <b>Category<sup>a</sup>:<br/>Change refers to</b> | <b>Date</b> | <b>Description of change</b>   | <b>Rationale</b> |
|---------------------------------------------------|-------------|--------------------------------|------------------|
| Not applicable                                    | 28 May 2021 | Not applicable – first version | Not applicable   |

<sup>a</sup> Pre-specified categories are: Primary or secondary endpoints; Statistical analysis method for the primary or secondary endpoints; Derivation of primary or secondary endpoints; Multiple Testing Procedure; Data presentations; Other



## 1. INTRODUCTION

The Statistical Analysis Plan (SAP) describes the statistical analysis of immune markers measured at key time points post-vaccination as correlates of protection against COVID-19.

This document references concepts published in “CoVPN COVID-9 Vaccine Efficacy Trial Immune Correlates SAP” by the CoVPN Biostatistics Team. Version 0.1, November 9, 2020.

### 1.1 Study Cohort for Correlates Analyses

Blood samples were taken  $28 \pm 14$  days (14 to 42 days) after the first dose and  $28 \pm 14$  days (14 to 42 days) after a second dose in vaccine recipients. An additional 7-day window (35 day timepoint; case date > blood sample collection date + 7) is implemented to exclude cases in which exposure is likely to have occurred before a blood sample was taken.

#### 1.1.1 Single Dose Analyses

The Single Dose for Correlates population is defined as AZD1222 recipients who received a first standard dose (SD) or low dose (LD) vaccine, having follow-up time accrued at least 7 days after their day 28 blood sample visit after a first vaccine.

Cases will be those which meet study endpoint definitions as detailed below and occur more than 7 days after the day 28 visit (+/- 14 days) after a first SD or LD vaccine and before a booster dose in the Single Dose for Correlates population. Participants with evidence of infection prior to day 35 will be excluded.

The control cohort consists of participants in the Single Dose for Correlates population who have no evidence of infection with COVID-19 up to the data cut-off date for analysis, and for whom immune marker data is available for analysis.

#### 1.1.2 Two Dose Analyses

Two Dose for Correlates population is defined as AZD1222 recipients who received SD/SD, LD/SD, SD/LD, LD/LD vaccines, having follow-up time accrued until at least 7 days after their boost + 28 day study visit.

Cases will be those which meet study endpoint definitions as detailed below and occur more than 7 days after their boost + 28 day study visit in the Two Dose for Correlates population. Participants with COVID-19 infection prior to 7 days after their boost + 28 day study visit will be excluded.

The control cohort consists of participants in the Two Dose for Correlates population who have no evidence of infection with COVID-19 up to the data cut-off date for analysis, and for whom immune marker data is available for analysis.

## 1.2 Study Endpoints

- 1 Primary symptomatic COVID-19
- 2 Asymptomatic infection or infection with unknown symptoms (COV002 only)
- 3 Moderate – severe symptomatic COVID-19 (World Health Organization [WHO] score  $\geq 3.0$ )
- 4 Hospitalisation (WHO score  $\geq 4.0$ ) (if sufficient cases available)
- 5 Any RT-PCR+

### Sensitivity analysis endpoints

- 1 Primary symptomatic COVID-19 with/without shortness of breath
- 2 Primary symptomatic COVID-19 with 3 or more/less than 3 symptoms

## 1.3 Sample Size

For each main endpoint at least 40 cases will be required for analysis.

## 1.4 Immune Markers

Main analyses will be conducted using the following assays, with additional exploratory analysis conducted where data become available from additional assays.

- 1 Spike- and receptor binding domain (RBD)-specific IgG response to SARS-CoV-2 by multiplexed immunoassay (PPD)
- 2 Antibody neutralisation using a lentivirus-based pseudovirus particle expressing the SARS-CoV-2 spike protein (Monogram)
- 3 Antibody neutralisation using live SARS-CoV-2 (PHE)

Fold change from pre-boost to post-boost time points may also be explored, as well as the ratio of binding to neutralising antibody.

## 2. ANALYSIS

### 2.1 Data summaries

Descriptive summaries of all timepoints will be presented as boxplots and tables of summary statistics, overall and by outcome, according to standard conventions as outlined in the MAA SAP Section 7.1.

Cumulative incidence will be presented by tertile of immune response.

## **2.2 Risk model (Proxy for SARS-CoV-2 Exposure in participants who received control vaccine)**

A baseline risk score will be developed on MenACWY control group participants to use in correlates analysis to adjust for potential confounding due to variability in exposure to SARS-CoV-2 in the participants with antibody data. Only data prior to unblinding will be included in the risk model.

Baseline variables for consideration in the risk model include (but not limited to), age in years, baseline comorbidities (at least one of the following: cardiovascular disorder, respiratory disease, or diabetes), body mass index ( $BMI \geq 30$  kg/m<sup>2</sup> at baseline, non-white ethnicity and health care worker status. Where analyses include data from more than one study/country, then study or country will be included in the risk score. Other variables such as sex and geographic region may also be explored as risk predictors.

The risk score will be developed for Single Dose for Correlates and Two Dose for Correlates controls separately using a logistic regression model with the outcome in the model being one of the study endpoints listed in Section 1.2. A separate risk score will be developed for each study endpoint. If the risk score is highly similar across a set of endpoints, then a single risk score may be selected for application to each endpoint in the set.

The risk score will be developed on the MenACWY control group participants and then used to predict risk of exposure in the participants in the AZD1222 vaccine arm on an individual level. The predicted risk of exposure will be included as a covariate in the Correlates of Risk model (Section 2.4).

## **2.3 Risk model for availability of antibody data (AZD1222 arm)**

Antibody data will not be available for all participants in the AZD1222 vaccine arm of the studies. There will be more data on cases than on non-cases in the vaccine arm, and samples selected for analysis are not entirely random. Therefore, estimates of overall absolute risk of infection calculated from these data will be inflated and result in bias to correlates estimates. To account for this a model will be developed to predict the probability of antibody data being available for inclusion in the analysis based on baseline characteristics in the AZD1222 vaccine arm. Variables used in the prediction model will include age group (18-55 years, 56-69 years, 70 years or above), whether the participant is a case or non-case, the type of case (primary symptomatic, non-primary symptomatic, asymptomatic/unknown symptoms), prime-boost interval and dosage (LD/LD, LD/SD, SD/SD). Probabilities will be exported from the model and the inverse probability used to weight the correlates models described in Section 2.4.

## 2.4 Correlates of Risk

Models will be derived for each endpoint and immune marker separately, and for each country separately. Combined analyses across countries/studies may also be conducted where feasible.

For each endpoint, generalised additive model (GAM) models for binary data (with logit link functions) will be fitted, adjusting for the baseline risk score from Section 2.2, and weighted by the inverse of the probability derived in Section 2.3. Individual level predicted probabilities will be output from each model and plotted against log-transformed antibody responses (Figure 1). Generalised linear models (GLM) will be fitted as a sensitivity analysis.

**Figure 1** Example plot of predicted probabilities against antibody values

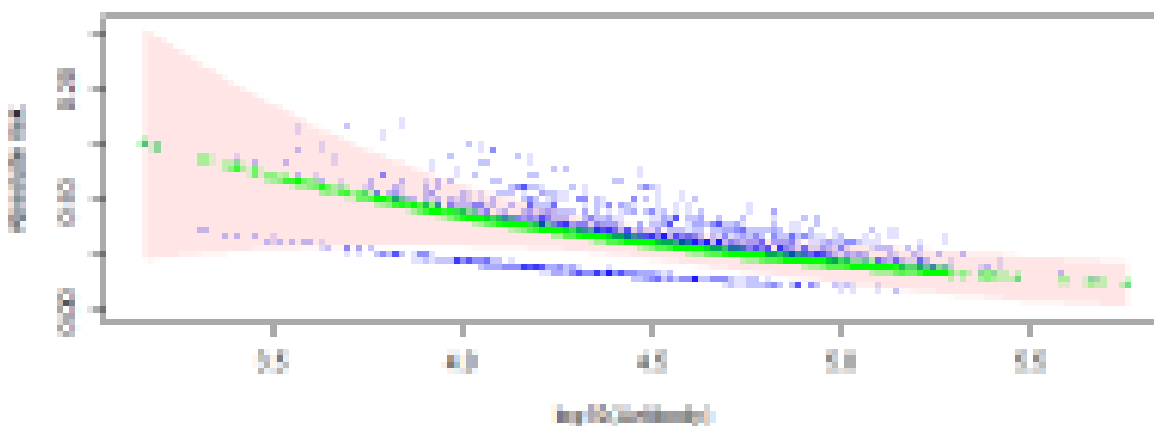

## 2.5 Correlates of Vaccine Efficacy (CoVE)

To derive the relative risk and correlate of vaccine efficacy, the average risk of infection at each level of antibody response in the vaccine arm, derived from the correlates of risk analysis in Section 2.4, will be divided by the total risk of infection in the MenACWY control group. The total risk in the MenACWY group will be a weighted average of the risk of the outcome across all study groups, weighted by the randomisation ratio in each group. 95% confidence intervals will be derived by bootstrapping.

## 2.6 Imputation of Censored Data

For some individuals, the antibody titre results are censored as their values are below the lower limit of quantification of the assay (LLOQ). We will impute half the LLOQ for these censored values.

The pseudoneutralising antibody titre contained more censored values (approx. 10%) below the detection limit than the other titres. Brand et al 2019 consider methods for dealing with missing data when a bootstrap is required. They found a single imputation scheme embedded within the bootstrap percentile method outperformed all other methods. As a sensitivity

analysis we will impute the censored pseudoneutralising antibody titre results embedded within the bootstrap, using a Bayesian linear regression or Tobit regression scheme.

### **3. REFERENCES**

#### **Brand et al 2019**

Brand J, van Buuren S, le Cessie S, van den Hout W. Combining multiple imputation and bootstrap in the analysis of cost-effectiveness trial data. *Statistics in Medicine*. 2019; 38: 210–220. <https://doi.org/10.1002/sim.7956>
